# Supplementary material
Source: Research Square preprint supplement (doi:10.21203/rs.3.rs-9067312/v1)
Supplement: Supplementary file 1 [file 6bf5b66923be0e7ba3d3bb07.xlsx]

## Sheet: Table7
		Table 7. What is the flush volume?
		Type of administered drug		approximately 5 mL or less	approximately 10 mL	approximately 20 mL	no specific stipulation	unknown	5 to 10 mL, depending on the medication and route	other
			before the administration of general medications	5	22	3	1	2	2	－
			after the administration of general medications	5	22	4	2	0	2	－
			before and after the administration of lipid emulsions	2	20	4	3	3	1	2 (Not adopted)
			before and after the administration of medications with incompatibility	4	24	4	1	2	0	－
