# Supplementary material
Source: Research Square preprint supplement (doi:10.21203/rs.3.rs-9067312/v1)
Supplement: Supplementary file 2 [file 6fbf9d4ef30648547618b99b.xlsx]

## Sheet: Table３
			Table 3. How frequently are PPN solutions prepared under aseptic conditions? (n=9)
			Response Options	Number of responses
			recurring prescriptions on all days (including weekends and holidays)	2
			recurring prescriptions on weekdays only	2
			all prescriptions on weekdays and Saturdays	1
			only for recurring prescriptions with designated administration times on all days	1
			prescriptions that fall under pre-agreed rules (Designated time slots, Hematology and Oncology departments)	2
			only drugs that require aseptic preparation according to the package insert and require complex preparation procedures	1
