# Supplementary material
Source: Research Square preprint supplement (doi:10.21203/rs.3.rs-9067312/v1)
Supplement: Supplementary file 3 [file b0256af94feccf760e487d2d.xlsx]

## Sheet: Table1
		Table 1. Survey Questionnaire Content
				Survey Question		Response form	Response Options
				Sex		SA	Male, Female, No response
				Occupation		SA・FA	Doctors, Pharmacists, Nurses, Other healthcare professionals ( )
				Age		SA	20s, 30s, 40s, 50s, 60s and older
				Years of experience		SA	3 to 5 years, 5 to 10 years, 10 to 20 years, 20 years or more
				Preparing TPN solutions under aseptic conditions?		SA	Yes, No
			If you answered "Yes" to the question "Preparing TPN solutions under aseptic conditions?"
				How frequently are TPN solutions prepared under aseptic conditions?		MA・FA	all days, weekdays only, recurring prescriptions only, other ( )
				Who is the preparer?		MA・FA	Doctors, Pharmacists, Nurses, Other healthcare professionals ( )
			If you answered "No" to the question "Preparing TPN solutions under aseptic conditions?"			-	-
				Do you have any plans to implement the aseptic preparation of TPN solutions in the future?		SA	Yes, No
				Who will implement the aseptic preparation of TPN solutions in the future？			Pharmacists, Nurses, Other healthcare professionals ( )
				Preparing PPN solutions under aseptic conditions?		-	-
			If you answered "Yes" to the question "Preparing PPN solutions under aseptic conditions?"
				How frequently are PPN solutions prepared under aseptic conditions?		MA・FA	Pharmacists, Nurses, Other healthcare professionals ( )
				Who is the preparer?		MA・FA	Pharmacists, Nurses, Other healthcare professionals ( )
			If you answered "No" to the question "Preparing PPN solutions under aseptic conditions?"			-	-
				Do you have any plans to implement the aseptic preparation of PPN solutions in the future?		SA	Yes, No
				Who will implement aseptic preparation of PPN solutions in the future？		SA・FA	Pharmacists, Nurses, Other healthcare professionals ( )
				Is a lipid emulsion adopted?		SA	Yes, No
				What products are used?		MA	10% 250 mL formulations, 20% 50 mL formulations, 20% 100 mL formulations, 20% 250 mL formulations
				Is a lipid emulsion administered during TPN administration? (Regardless of the timing of initiation)		SA	Yes, No
				Is a lipid emulsion administered during PPN administration? (Regardless of the timing of initiation)		SA	Yes, No
				In each of the above cases, when is the lipid emulsion administered?		SA・FA	administered from the start of TPN / PPN solutions, added one week after initiation, added four weeks after initiation, administered upon recommendation from NST or pharmacists, never administered, Other ( )
				When administering 100 mL of a 20% lipid emulsion to a patient weighing 50 kg, how long does it take to administer it?		SA	less than 1 hour, approximately 1 hour, approximately 2 hours, approximately 3 hours, 4 hours or more, unknown
				Are there any hospital regulations regarding 'flush' administration?		SA	Yes, No
				When administering lipid emulsions or other medications via the side port of the infusion line, do you flush the line before and after administration? When is that?		SA・FA	flush for lipid emulsions and non - lipid emulsion medications, flush only for lipid emulsions, flush for lipid emulsions; unknown for others, no flush, unknown ( )
				Are there any regulations regarding the volume of flush administered within the hospital?		SA	Yes, No, Unknown
			Question for facilities with regulations.
				What is the volume of the flush before the administration of general medications?		SA・FA	approximately 5 mL or less, approximately 10 mL, approximately 20 mL, no specific stipulation, unknown, other ( )
				What is the volume of the flush after the administration of general medications?		SA・FA	approximately 5 mL or less, approximately 10 mL, approximately 20 mL, no specific stipulation, unknown, other ( )
				What is the volume of the flush using a lipid emulsion (before and after administration)?		SA・FA	approximately 5 mL or less, approximately 10 mL, approximately 20 mL, no specific stipulation, unknown, other ( )
				What is the volume of the flush when using medications with incompatibility, such as phenytoin (before and after administration)?		SA・FA	approximately 5 mL or less, approximately 10 mL, approximately 20 mL, no specific stipulation, unknown, other ( )
				Are there any other regulations within the hospital? What are they?		FA
				How is the flush administered?		SA・FA	slow infusion rate (injection at a constant rate), pulsing method (administered in several divided doses), administration method varies depending on the drug (details: )
							SA: Single answer, MA: Multiple answers, FA: Free response
