# Supplementary material
Source: Research Square preprint supplement (doi:10.21203/rs.3.rs-9067312/v1)
Supplement: Supplementary file 4 [file b5395314063584a8a65b5e3f.xlsx]

## Sheet: Table5
		Table 5. Timing of Lipid Emulsion Administration
		a. Is a lipid emulsion administered during TPN administration? (Regardless of the timing of initiation) (n=56)
				Response Options	Number of responses
			administered upon recommendation from NST or pharmacists		33
			added one week after initiation		13
			administration generally begins at the start of TPN		3
			never administered		3
			other		4
				administered at the physician's discretion	2
				varies depending on the patient's condition	1
				although rarely administered, it may be administered depending on the referring hospital's usage practices.	1
		b. Is a lipid emulsion administered during PPN administration? (Regardless of the timing of initiation) (n=56)
			Response Options		Number of responses
			administered upon recommendation from NST or pharmacists		38
			added one week after initiation		5
			added four weeks after initiation		4
			administration generally begins at the start of PPN		1
			never administered		2
			other		6
				administered at the physician's discretion	2
				varies depending on the patient's condition	2
				added based on blood test values; therefore, timing varies	1
				administered early depending on the department	1
