# Supplementary material
Source: Research Square preprint supplement (doi:10.21203/rs.3.rs-9067312/v1)
Supplement: Supplementary file 5 [file db949c5568c0658d52790904.xlsx]

## Sheet: Table６
		Table 6. When administering lipid emulsions or other medications via the side port of the infusion line, do you flush the line before and after administration? (n=63)
			Response Options	Number of responses
			flush for lipid emulsions and non - lipid emulsion medications	25
			flush only for lipid emulsions	16
			flush for lipid emulsions; unknown for others	7
			no flush	6
			unknown	9
