# Supplementary material
Source: Research Square preprint supplement (doi:10.21203/rs.3.rs-9067312/v1)
Supplement: Supplementary file 6 [file db9be43db02e91252f9b9f8a.xlsx]

## Sheet: Table2
			Table 2. How frequently are TPN solutions prepared under aseptic conditions? (n=41)
			Response Options	Number of responses
			all prescriptions on all days (including weekends and holidays)	17
			recurring prescriptions on all days (including weekends and holidays)	10
			recurring prescriptions on weekdays and Saturdays	5
			recurring prescriptions on weekdays only	5
			all prescriptions on weekdays and Saturdays	1
			all prescriptions on weekdays	1
			all NICU-only prescriptions on weekdays (weekend prescriptions are prepared on Fridays)	1
			TPN solutions requiring dose adjustment	1
