# Supplementary material
Source: Research Square preprint supplement (doi:10.21203/rs.3.rs-9067312/v1)
Supplement: Supplementary file 7 [file f74368e736d6724ca2e0b0b3.xlsx]

## Sheet: Table４
		Table 4. What products are used?
			Product Name	Number of responses
			10% 250 mL formulations	7
			20% 50 mL formulations	3
			20% 100 mL formulations	45
			20% 250 mL formulations	4
				(Multiple answers)
